# Supplementary material
Source: PubMed Central journal article supplement (PMC8212421)

**Supporting Information**

**Figure S1. SNR improvements by combining multi-echo images.** (A) The peak SNRs of 1<sup>st</sup> echo ( $SNR_{echo\ 1}$ ) and echo-combined ( $SNR_{combined}$ ) HP images are summarized for animals (top) and humans (bottom). (B) SNR maps from 1<sup>st</sup> echo ( $SNR_{echo\ 1}$ ) and echo-combined ( $SNR_{combined}$ ) HP images and the SNR-enhancement maps ( $SNR_{combined}/SNR_{echo\ 1}$ ) at 25 s post the injection from a representative participant.

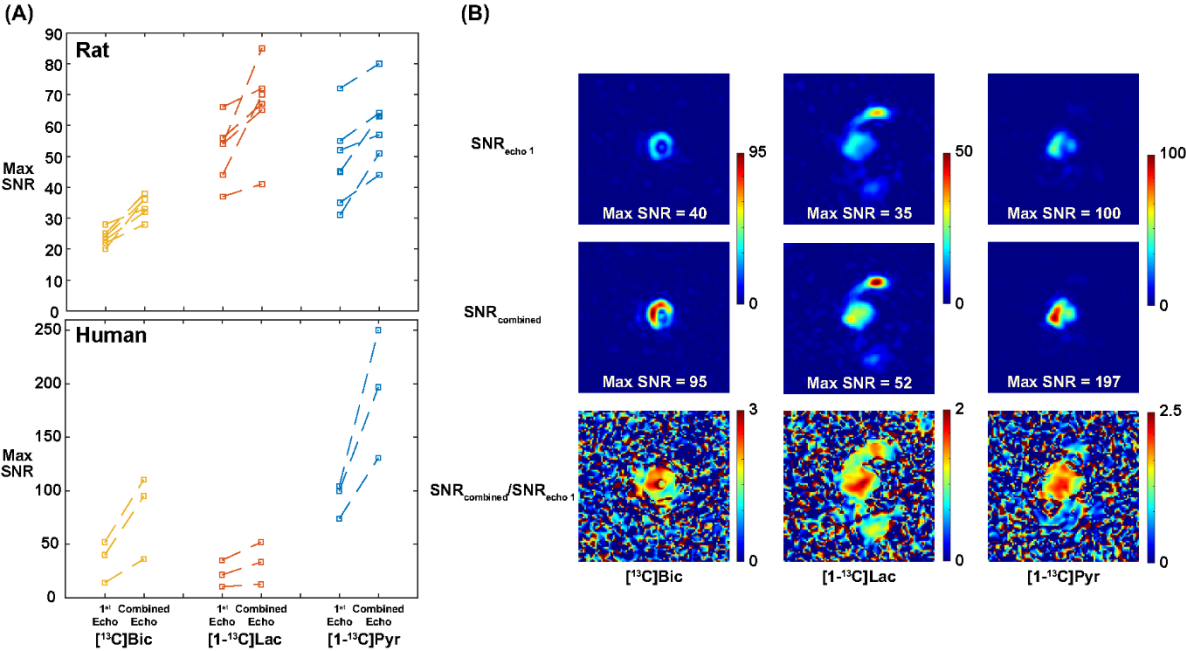

Supplement: NIHMS1712064-supplement-Supporting_Information.pdf [file NIHMS1712064-supplement-Supporting_Information.pdf]
